# Supplementary material
Source: publisher figshare collection journal article supplement (https://sage.figshare.com/ndownloader/files/14375462)
Supplement: Supplementary file 1 [file 14375462]

Patient Initial: \_\_\_\_\_ Acc no: \_\_\_\_\_ Date: \_\_\_\_\_

## Appendix A

### Illness Understanding Questionnaire

Please answer each question by marking the box with your response

|                                                      | YES   | NO    |
|------------------------------------------------------|-------|-------|
| 1. My cancer is curable                              | _____ | _____ |
| 2. The goals of therapy are to:                      | _____ | _____ |
| a. Help me live longer                               | _____ | _____ |
| b. Try to make me feel better                        | _____ | _____ |
| c. Get rid of my cancer                              | _____ | _____ |
| 3. How would you describe your current health status | _____ | _____ |
| a. Relatively healthy                                | _____ | _____ |
| b. Seriously ill but not terminally ill              | _____ | _____ |

**Appendix B.**

Participant's Initials: \_\_\_\_\_ Acc#: \_\_\_\_\_ Date: \_\_\_\_/\_\_\_\_/\_\_\_\_

**Decision Making Preferences Questionnaire - Patient****P1. In my opinion, decisions about my care should be made (please choose ONLY ONE):**

|  |                                                                               |
|--|-------------------------------------------------------------------------------|
|  | 1. By myself.                                                                 |
|  | 2. By myself, after hearing the doctor's opinion or input.                    |
|  | 3. By myself, after hearing my family's opinion or input.                     |
|  | 4. By myself, after hearing both my family and the doctor's opinion or input. |
|  | 5. By my family.                                                              |
|  | 6. By my family, after hearing my opinion or input.                           |
|  | 7. By my family, after hearing my doctor's opinion or input.                  |
|  | 8. By my family, after hearing both my doctor's and my opinion or input.      |
|  | 9. By the doctor.                                                             |
|  | 10. By the doctor, after hearing my opinion or input.                         |
|  | 11. By the doctor, after hearing my family's opinion or input.                |
|  | 12. By the doctor, after hearing both my family and my opinion or input.      |
|  | 13. Shared between myself and my doctor.                                      |
|  | 14. Shared between myself and my family.                                      |
|  | 15. Shared between myself and both my family and doctor.                      |

**P2. How strongly do you feel about your preference selected above?**

|                            |                          |                          |                          |                          |                          |                          |                          |                          |                          |                          |                          |
|----------------------------|--------------------------|--------------------------|--------------------------|--------------------------|--------------------------|--------------------------|--------------------------|--------------------------|--------------------------|--------------------------|--------------------------|
| Not<br>important<br>at all |                          |                          |                          |                          |                          |                          |                          |                          |                          |                          | Very<br>important        |
| 0                          | 1                        | 2                        | 3                        | 4                        | 5                        | 6                        | 7                        | 8                        | 9                        | 10                       |                          |
| <input type="checkbox"/>   | <input type="checkbox"/> | <input type="checkbox"/> | <input type="checkbox"/> | <input type="checkbox"/> | <input type="checkbox"/> | <input type="checkbox"/> | <input type="checkbox"/> | <input type="checkbox"/> | <input type="checkbox"/> | <input type="checkbox"/> | <input type="checkbox"/> |

**P3. How were the decisions about your care actually made? (please choose ONLY ONE)**

|                          |                                                                               |
|--------------------------|-------------------------------------------------------------------------------|
| <input type="checkbox"/> | 1. By myself.                                                                 |
| <input type="checkbox"/> | 2. By myself, after hearing the doctor's opinion or input.                    |
| <input type="checkbox"/> | 3. By myself, after hearing my family's opinion or input.                     |
| <input type="checkbox"/> | 4. By myself, after hearing both my family and the doctor's opinion or input. |
| <input type="checkbox"/> | 5. By my family.                                                              |
| <input type="checkbox"/> | 6. By my family, after hearing my opinion or input.                           |
| <input type="checkbox"/> | 7. By my family, after hearing my doctor's opinion or input.                  |
| <input type="checkbox"/> | 8. By my family, after hearing both my doctor's and my opinion or input.      |
| <input type="checkbox"/> | 9. By the doctor.                                                             |
| <input type="checkbox"/> | 10. By the doctor, after hearing my opinion or input.                         |
| <input type="checkbox"/> | 11. By the doctor, after hearing my family's opinion or input.                |
| <input type="checkbox"/> | 12. By the doctor, after hearing both my family and my opinion or input.      |
| <input type="checkbox"/> | 13. Shared between myself and my doctor.                                      |
| <input type="checkbox"/> | 14. Shared between myself and my family.                                      |
| <input type="checkbox"/> | 15. Shared between myself and both my family and doctor.                      |

**P4. With regards to the participation of my doctor in the decisions about my care (please choose one):**

|  |                                                                                                   |
|--|---------------------------------------------------------------------------------------------------|
|  | 1. I would prefer to make the treatment decisions on my own.                                      |
|  | 2. I would prefer to make the decisions by myself after hearing my doctor's opinion or input.     |
|  | 3. I would prefer to make the decisions together with my doctor.                                  |
|  | 4. I would prefer that my doctor make the decisions after talking with me and hearing my opinion. |
|  | 5. I would prefer that my doctor make the decisions on his/her own.                               |
|  | 6. I don't know.                                                                                  |
|  | 7. I prefer not to answer.                                                                        |

**P5. With regards to the participation of my family in the decisions about my care (please choose one):**

|  |                                                                                                   |
|--|---------------------------------------------------------------------------------------------------|
|  | 1. I would prefer to make the treatment decisions on my own.                                      |
|  | 2. I would prefer to make the decisions by myself after hearing my family's opinion or input.     |
|  | 3. I would prefer to make the decisions together with my family.                                  |
|  | 4. I would prefer that my family make the decisions after talking with me and hearing my opinion. |
|  | 5. I would prefer that my family make the decisions on their own.                                 |
|  | 6. I don't know.                                                                                  |
|  | 7. I prefer not to answer.                                                                        |

**P6. With regards to the relationship between my family and my doctor in the decisions about my care (please choose one):**

|  |                                                                                                               |
|--|---------------------------------------------------------------------------------------------------------------|
|  | 0. I believe that my family and my doctor on their own should not make treatment decisions about my care.     |
|  | 1. I would prefer that my family makes the treatment decisions on their own.                                  |
|  | 2. I would prefer that my family makes the decisions on their own after hearing my doctor's opinion or input. |
|  | 3. I would prefer that my family makes the decisions together with my doctor.                                 |
|  | 4. I would prefer that my doctor makes the decisions after talking with my family and hearing their opinion.  |
|  | 5. I would prefer that my doctor make the decisions on his/her own.                                           |
|  | 6. I don't know.                                                                                              |
|  | 7. I prefer not to answer.                                                                                    |

**Appendix C****Satisfaction with Decisions and Care Questionnaire - Patient****P5. Please rate your agreement with the following statements:**

|                                                                  | <b>0<br/>Completely<br/>disagree</b> | <b>1<br/>Disagree</b>    | <b>2<br/>Undecided</b>   | <b>3<br/>Agree</b>       | <b>4<br/>Completely<br/>agree</b> |
|------------------------------------------------------------------|--------------------------------------|--------------------------|--------------------------|--------------------------|-----------------------------------|
| a. I am satisfied with the information I received about my care  | <input type="checkbox"/>             | <input type="checkbox"/> | <input type="checkbox"/> | <input type="checkbox"/> | <input type="checkbox"/>          |
| b. I am satisfied with the way decisions about my care were made | <input type="checkbox"/>             | <input type="checkbox"/> | <input type="checkbox"/> | <input type="checkbox"/> | <input type="checkbox"/>          |
| c. I am satisfied with the decisions about my care               | <input type="checkbox"/>             | <input type="checkbox"/> | <input type="checkbox"/> | <input type="checkbox"/> | <input type="checkbox"/>          |
